# Supplementary material
Source: Springer Nature journal article supplement (https://www.springermedizin.de/resource/supplementary/12879_2013_2420_MOESM12_ESM.pdf/9444524)

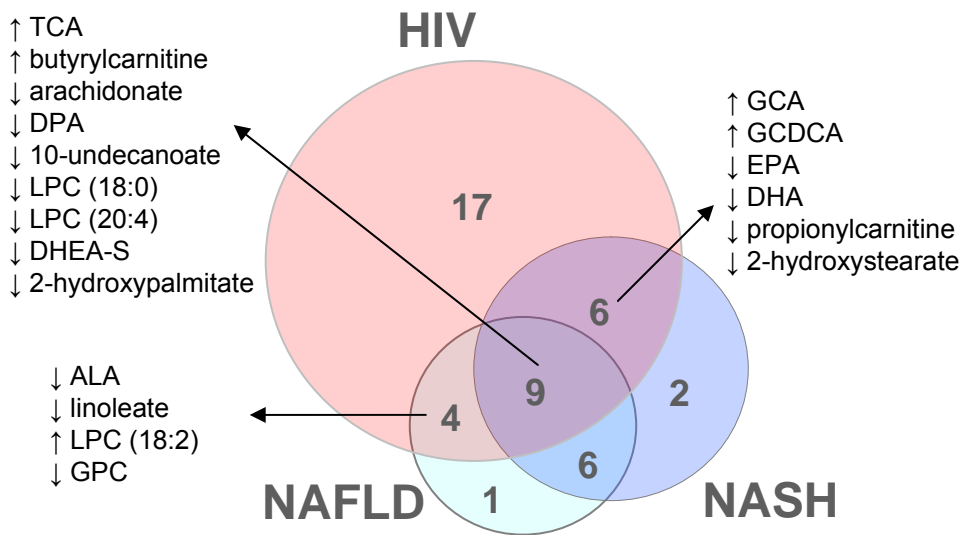

Supplement: MOESM12 [file 9444524]
